# Supplementary material for: Evaluation of a 3D Printed Silicone Oral Cavity Cancer Model for Surgical Simulations
Source: MDPI journal article supplement (doi:10.3390/jpm14050450), 2024-04-25
Supplement: s1 [file s1]

# Questionnaire evaluation of surgical simulation models

Year of experience

Date

Model evaluated: Silicone model / Pig tongue model

## FACE VALIDITY

|                                                       |   |   |   |   |   |
|-------------------------------------------------------|---|---|---|---|---|
| Tongue model feels realistic                          | 1 | 2 | 3 | 4 | 5 |
| Tumor model feels realistic                           | 1 | 2 | 3 | 4 | 5 |
| Performing the Incision and operation feels realistic | 1 | 2 | 3 | 4 | 5 |

1 = Poor 2 = Unsatisfactory 3 = Satisfactory 4 = Good 5 = Excellent

## CONTENT VALIDITY

|                                                                  |   |   |   |   |   |
|------------------------------------------------------------------|---|---|---|---|---|
| The simulation aids to appreciate margins in oral cancer surgery | 1 | 2 | 3 | 4 | 5 |
| The simulation improved my surgical techniques                   | 1 | 2 | 3 | 4 | 5 |
| The simulation improved my understanding of margin sampling      | 1 | 2 | 3 | 4 | 5 |

1 = Poor 2 = Unsatisfactory 3 = Satisfactory 4 = Good 5 = Excellent

### UTILITY OF MODEL AS TRAINING TOOL

|                                                                    |   |   |   |   |   |
|--------------------------------------------------------------------|---|---|---|---|---|
| The model is ideal for medical student                             | 1 | 2 | 3 | 4 | 5 |
| The model is ideal for residents                                   | 1 | 2 | 3 | 4 | 5 |
| The model is ideal for fellows                                     | 1 | 2 | 3 | 4 | 5 |
| The model is ideal for ENT surgeons as part of continual education | 1 | 2 | 3 | 4 | 5 |

1 = Poor 2 = Unsatisfactory 3 = Satisfactory 4 = Good 5 = Excellent
